## **Rapid microbial interaction network inference in microfluidic droplets**

Ryan H. Hsu<sup>1</sup>, Ryan L. Clark<sup>1</sup>, Jin Wen Tan<sup>1</sup>, Philip A. Romero<sup>1,3</sup> & Ophelia S. Venturelli<sup>1,2,3\*</sup>

<sup>1</sup>Department of Biochemistry, University of Wisconsin-Madison, Madison, WI 53706

<sup>2</sup>Department of Bacteriology, University of Wisconsin-Madison, Madison, WI 53706

<sup>3</sup>Department of Chemical & Biological Engineering, University of Wisconsin-Madison, Madison, WI 53706

\*To whom correspondence should be addressed: [venturelli@wisc.edu](mailto:venturelli@wisc.edu)

## 1 **ABSTRACT**

2 Microbial interactions are major drivers of microbial community dynamics and functions. However,  
3 microbial interactions are challenging to decipher due to limitations in parallel culturing of sub-  
4 communities across many environments and accurate absolute abundance quantification of  
5 constituent members of the consortium. To this end, we developed Microbial Interaction Network  
6 Inference in microdroplets (MINI-Drop), a high-throughput method to rapidly infer microbial  
7 interactions in microbial consortia in microfluidic droplets. Fluorescence microscopy coupled to  
8 automated computational droplet and cell detection was used to rapidly determine the absolute  
9 abundance of each strain in hundreds to thousands of droplets per experiment. We show that  
10 MINI-Drop can accurately infer pairwise as well as higher-order interactions using a microbial  
11 interaction toolbox of defined microbial interactions mediated by distinct molecular mechanisms.  
12 MINI-Drop was used to investigate how the molecular composition of the environment alters the  
13 interaction network of a three-member consortium. To provide insight into the variation in  
14 community states across droplets, we developed a probabilistic model of cell growth modified by  
15 microbial interactions. In sum, we demonstrate a robust and generalizable method to probe  
16 cellular interaction networks by random encapsulation of sub-communities into microfluidic  
17 droplets.

## 18 **INTRODUCTION**

19 Microbial communities have a tremendous impact on diverse environments ranging from the  
20 human body to the plant rhizosphere (Berendsen et al., 2012; Clemente et al., 2012). Microbe-  
21 microbe and environment-microbe interactions are major determinants of microbial communities  
22 and microbiomes (Cao et al., 2018; Venturelli et al., 2016). Deciphering interaction networks in  
23 high-dimensional microbial communities is challenging due to the need to rapidly and accurately  
24 determine the absolute abundance of each community member across many sub-communities  
25 and environments (Cao et al., 2017; Harcombe et al., 2016).

26 The population sizes of microbial consortia can range from less than ten cells in mixed  
27 species biofilm aggregates to  $10^{11}$  cells  $\text{mL}^{-1}$  in the human colon (Connell et al., 2014; Sender et  
28 al., 2016; Stoodley et al., 2001). Cellular growth history, the temporal order of strain colonization  
29 or the initial phase of microbial competition can impact community assembly (von Bronk et al.,  
30 2017; Kong et al., 2018; Vega and Gore, 2017; Venturelli et al., 2018; Zhou et al., 2013). Our  
31 understanding of microbial consortia in small populations is limited due to technical challenges in  
32 the manipulation and analysis of small populations of cells (Connell et al., 2014). Therefore, high-  
33 throughput methods that can rapidly resolve microbial interaction networks across different initial  
34 community states, population sizes and environments would enable a better understanding of the  
35 key parameters shaping the structure and function of microbial communities and how to harness  
36 these systems for diverse biotechnological applications.

37 Microbial interaction network inference requires accurate measurements of the absolute  
38 abundance of each member of the community (Fisher and Mehta, 2014). Recent experimental  
39 efforts have used models trained on measurements of 1-3 member communities to predict  
40 community composition or function of up to 12 members to varying degrees of accuracy  
41 (Friedman et al., 2017; Guo and Boedicker, 2016; Kong et al., 2018; Mounier et al., 2008;  
42 Venturelli et al., 2018). Absolute abundance quantification of each member of a microbial  
43 community has ranged from low-throughput selective plating to count colony forming units (tens  
44 of samples per experiment) (Mounier et al., 2008) to optical density multiplied by relative  
45 abundance based on next-generation sequencing of samples generated through robotic high-  
46 throughput culturing (hundreds of samples per experiment) (Venturelli et al., 2018).

47 Encapsulation of microbial communities into microdroplets has been used to study  
48 ecological and evolutionary processes of microbial communities (Bachmann et al., 2013; Park et  
49 al., 2011). Water-in-oil droplets can be generated at kilohertz (kHz) rates using microfluidics,  
50 wherein cells from a mixed culture are randomly encapsulated into droplets yielding diverse sub-  
51 communities that can be studied in parallel (millions of samples per experiment). Each droplet is  
52 a miniaturized compartment that can be used to study interactions between community members  
53 in small populations. Microfluidic technologies enable the generation of well-controlled droplet  
54 environments of ~1% size variation (Guo et al., 2012). However, previous studies have not fully  
55 leveraged the capabilities of this technology to quantitatively investigate microbial communities.  
56 Further, we lack a systematic method to rapidly infer microbial interactions using droplet  
57 microfluidics in different environmental contexts.

58 To address this challenge, we developed Microbial Interaction Network Inference in  
59 Droplets (MINI-Drop). To determine the absolute abundance of each strain across hundreds to  
60 thousands of samples, we developed an automated computational method coupled to  
61 fluorescence microscopy to rapidly segment droplet images and accurately count fluorescently  
62 labeled cells within each droplet. We tested the capability of MINI-Drop to accurately infer  
63 microbial interactions using a microbial interaction toolbox composed of positive and negative  
64 interactions mediated by distinct molecular mechanisms. Our results demonstrate that MINI-Drop  
65 can accurately decipher pairwise as well as higher-order interactions by analyzing droplets  
66 containing 1-3 strains. We investigated how the molecular composition of the environment shapes  
67 the ecological network of a three-member consortium. A probabilistic model of cell growth  
68 modified by microbial interactions and cell death described the variability in community states  
69 across droplets containing the same initial strain composition, providing insight into the forces  
70 shaping community assembly in small populations.

## 71 RESULTS

72

### 73 *Inferring microbial interactions in microfluidic droplets*

74 Microbial interactions represent the net impact (positive, negative or negligible) of an organism  
75 on the growth of another over a specified time interval (Cao et al., 2018). Microbial interactions  
76 can be quantified by evaluating the difference in phenotype (e.g. growth response or metabolic  
77 activity) of an organism in the absence and presence of another strain (partner strain).  
78 Encapsulation of cells in a microbial community into droplets using techniques from droplet-  
79 microfluidics enables parallel culturing of many sub-communities (**Fig. 1a**). To infer microbial  
80 interactions, we needed a scalable method to determine the absolute abundance of each strain  
81 within each droplet. The average fluorescence in each droplet was not proportional to the number  
82 of cells due to variability in cellular growth rates, which dictates the rate of dilution of the  
83 fluorescent reporter (**Fig. S1a**). Therefore, we developed an automated procedure using  
84 techniques from computer vision to rapidly identify droplets (**Fig. S1b**) and count the number of  
85 fluorescently labeled cells in each droplet (**Fig. S1c**). The droplets were binned according to strain  
86 composition (**Fig. S1d**) and the cell counts were used to infer interaction type (positive, negative  
87 or negligible), strength and directionality (see Materials and Methods).

88 To evaluate the accuracy and dynamic range of the method, CFP-labeled *E. coli*, RFP-  
89 labeled *E. coli* and YFP-labeled *S. typhimurium* were mixed in equal volumetric ratios and serially  
90 diluted to generate a broad range of cell densities (**Fig. 1b**). Each dilution of the mixed culture  
91 was encapsulated into 34 picoliter (pL) droplets (40  $\mu$ m diameter), imaged using fluorescence

92 microscopy, and analyzed using a computational workflow (see Materials and Methods). The  
 93 number of cells of each fluorescently labeled strain decreased linearly with each dilution, with the  
 94 exception of the highest density droplets (**Fig. 1c, Fig. S2a**). These data demonstrate at least a  
 95 64-fold linear range of the cell counting method of each fluorescent reporter. In a separate  
 96 experiment involving growth of fluorescently labeled strains in droplets described below (**Table 1,**  
 97 **E6**), droplet size did not correlate with the number of cells labeled with CFP, YFP or RFP,  
 98 indicating that variation in droplet size did not contribute to variability in cell growth (**Fig. S2b,c,d**).  
 99

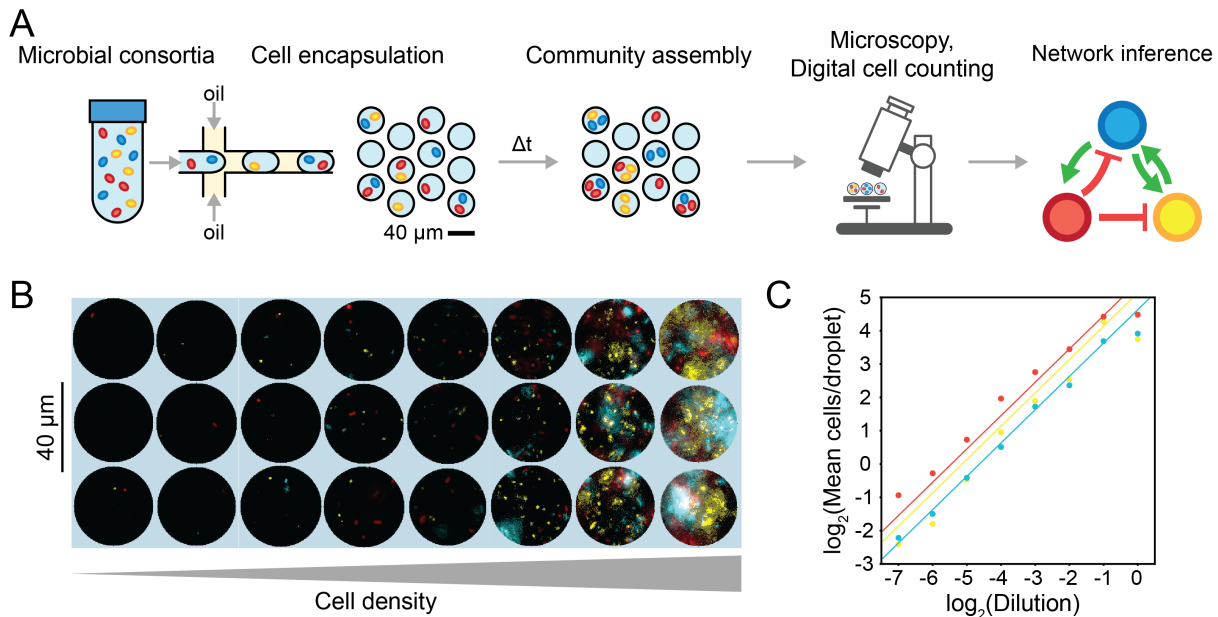

100

101 **Fig. 1. Overview and characterization of microbial interaction network inference in microdroplets**  
 102 **(MINI-Drop).** (a) Overview schematic of the MINI-Drop method. A mixed microbial culture and oil are loaded  
 103 into a droplet-forming microfluidic device. Cells are randomly encapsulated into droplets based on a Poisson  
 104 distribution. The droplets are incubated for a period of time to allow cell growth and division and then imaged  
 105 using fluorescent microscopy. A computer vision workflow rapidly identifies droplets and determines the  
 106 number of each fluorescently labeled strain within each droplet (**Fig. S1**). A microbial interaction network is  
 107 inferred based on the difference in the mean number of cells in the absence and presence of a partner  
 108 strain. (b) Representative fluorescent microscopy images of droplets containing three bacterial strains  
 109 labeled with YFP (ST Lac\*), RFP (EC WT) or CFP (EC Met-) (see **Table 2**). (c) Scatter plot of the dilution  
 110 factor of the mixed culture vs. the  $\log_2$  transform of the mean number of cells per drop (**Fig. S2a**). Each  
 111 data point represents the mean of 400-600 droplets and lines denote linear regression fits to the data. Red,  
 112 yellow and blue data points correspond to EC WT, ST Lac\* and EC Met-, respectively.

113

#### 114 *Investigating microbial interaction networks two-member consortia*

115 To determine whether MINI-Drop could illuminate microbial interactions in microbial consortia, we  
 116 investigated two-member consortia engineered to display defined interactions. A microbial  
 117 interaction was defined as a statistically significant difference in the average number of cells of a  
 118 given strain in the presence of a second strain (partner) compared to the absence of the partner  
 119 at a specific time point. To investigate positive interaction networks with MINI-Drop, we  
 120 constructed a consortium composed of an RFP-labeled *E. coli* methionine auxotroph (EC Met-)

121 and a GFP-labeled *B. subtilis* tryptophan auxotroph (BS Trp-, **Table 1**, E1). In the absence of  
122 supplemented amino acids, the growth of *B. subtilis* requires secretion of tryptophan from *E. coli*  
123 and the growth of *E. coli* requires secretion of methionine from *B. subtilis*, which together  
124 generates a bidirectional positive interaction network (**Fig. 2a**). The two species were mixed in  
125 equal proportions based on OD600 measurements, encapsulated into droplets such that each  
126 droplet had 1-2 cells on average according to a Poisson distribution and the droplets were  
127 incubated at 37°C for 18 hours. The fluorescence microscopy images demonstrated that single  
128 species droplets exhibited a low number of total cells, whereas droplets containing both species  
129 exhibited significantly higher number of cells of each strain (**Fig. 2b**). Specifically, the average  
130 number of EC Met- cells was 3.3-fold ( $p = 3.8e-26$ ) higher in the presence of BS Trp- compared  
131 to the average number of EC Met- in single-species droplets (**Fig. 2c**). Similarly, the average  
132 number of BS Trp- cells was 4.2-fold ( $p = 1.5e-6$ ) higher in the presence of EC Met- compared to  
133 the average number of BS Trp- cells in single-species droplets (**Fig. 2c**). The inferred interaction  
134 network exhibited bidirectional positive interactions, mirroring the topology of the expected  
135 interaction network (**Fig. 2a,d**), demonstrating that MINI-Drop could deduce positive interactions.  
136 Corroborating this result, the cell counts for BS Trp- and EC Met- were positively correlated (**Fig.**  
137 **S3a**).

138 We next investigated whether MINI-Drop could decipher negative interactions. A synthetic  
139 community was constructed wherein a GFP-labeled *E. coli* strain (sender strain) was engineered  
140 to express LuxI, a synthetase for the quorum-sensing signal C6 acyl homoserine lactone (AHL).  
141 AHL diffuses into the RFP-labeled *E. coli* strain (receiver strain), binds and activates the receptor  
142 LuxR, which regulates the expression of the MazF toxin (**Fig. 2e**, **Table 1**, E2). High expression  
143 levels of the endoribonuclease MazF inhibits cell growth by inducing mRNA decay (Venturelli et  
144 al., 2017), generating a strong negative interaction from the sender to the receiver. To  
145 characterize this community using MINI-Drop, the sender and receiver strains were mixed in equal  
146 proportions based on OD600, encapsulated into droplets and incubated at 37°C for 18 hr.  
147 Computational analysis of the fluorescent microscopy images showed that the number of receiver  
148 cells was significantly lower in droplets containing both the sender and receiver strains compared  
149 to the average number of receiver cells in single-strain droplets (**Fig. 2f**). The average number of  
150 receiver cells in the presence of the sender was 2.6-fold lower ( $p = 3.7e-14$ ) compared to the  
151 average number of receiver cells in droplets containing the receiver strain alone (**Fig. 2g**). In  
152 addition, the average number of sender cells was 1.25-fold lower ( $p = 2.2e-4$ ) in the presence of  
153 the receiver compared to in its absence (**Fig. 2g**). The average number of sender cells in droplets  
154 containing the sender strain alone was 16.7-fold higher than the average number of receiver cells  
155 in droplets containing only the receiver strain, presumably due to leakiness of *mazF* from the pLux  
156 promoter in the absence of AHL. Based on these data, the inferred interaction network exhibited  
157 a strong negative interaction from the sender to the receiver and a weak negative interaction from  
158 the receiver to the sender (**Fig. 2h**). The cell counts of the sender and receiver were negatively  
159 correlated across droplets, corroborating the presence of negative interactions (**Fig. S3b**). In sum,  
160 these data demonstrate that MINI-Drop can decipher negative interactions in microbial consortia.

161

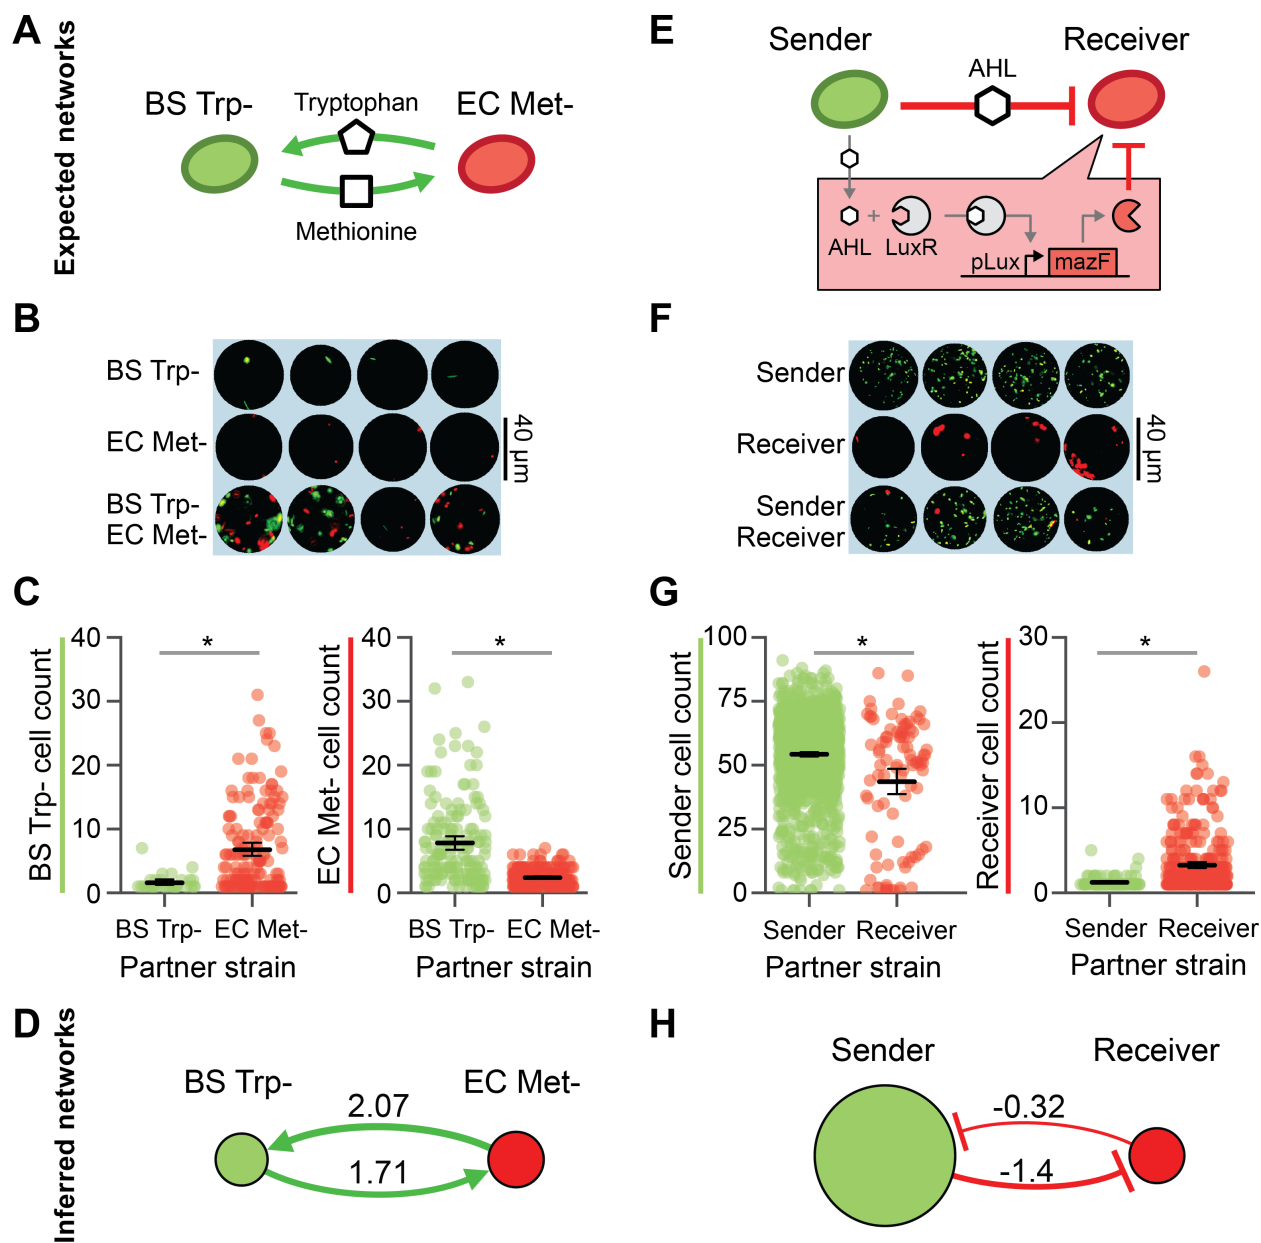

162

163 **Fig. 2. Investigating positive and negative microbial interaction networks using MINI-Drop.** (a)  
 164 Schematic of the expected network for a synthetic consortium composed of an RFP-labeled *E. coli*  
 165 methionine auxotroph (EC Met-) and a GFP-labeled *B. subtilis* tryptophan auxotroph (BS Trp-) (Table 1,  
 166 E1). (b) Fluorescence microscopy image of representative single-species (EC Met- or BS Trp-) or two-  
 167 member droplets. (c) Categorical scatter plot showing the number of BS Trp- or EC Met- cells in each  
 168 droplet. The black horizontal line represents the mean and the error bars denote bootstrapped 95%  
 169 confidence intervals for the mean. Gray lines denote statistically significant difference in means based on  
 170 the Mann-Whitney U test ( $n=87$ ,  $p=1.5e-6$ , left and  $n=372$ ,  $p=3.8e-26$ , right). (d) The inferred interaction  
 171 network for the EC Met-, BS Trp- consortium. The edge width is proportional to the  $\log_2$  ratio of the average  
 172 cell count in the presence of a partner to the average cell count in single strain droplets. Node size is  
 173 proportional to the average cell count of each strain in single strain droplets. (e) Schematic of the expected  
 174 network of an *E. coli* community that exhibits a strong unidirectional negative interaction. A GFP-labeled  
 175 strain (sender) expresses LuxI, a synthetase for the quorum-sensing signal C6 acyl homoserine lactone  
 176 (AHL). AHL binds to the receptor LuxR in an RFP-labeled strain (receiver) and activates the expression of

177 a toxin MazF, generating a strong negative interaction (**Table 1**, E2). **(f)** Fluorescence microscopy image  
178 of representative droplets containing the sender strain, receiver strain or community. **(g)** Categorical scatter  
179 plot of the number of sender or receiver cells in each droplet in the presence or absence of a partner. The  
180 black line represents the mean and the error bars denote bootstrapped 95% confidence intervals for the  
181 mean. Gray lines denote statistically significant differences in the means ( $n=1512$ ,  $p=2.2e-4$ , left,  $n=421$ ,  
182  $p=3.8e-14$ , right). **(h)** The inferred interaction network for the mazF inhibition consortium.

183

#### 184 *The molecular composition of the environment shapes a microbial interaction network*

185 The molecular composition of the environment influences the energetic costs and benefits of  
186 microbial interactions in microbial communities (Cao et al., 2018; Harcombe et al., 2016; Liu et  
187 al., 2017). A key challenge is predicting how the microbial interaction network is modulated by  
188 environmental parameters. To investigate this question, we constructed a three-member  
189 community consisting of two strains interacting via bidirectional positive interactions and a third  
190 strain that promoted growth of constituent members of the community but did not receive a benefit  
191 from the community. Specifically, the strains included RFP-labeled *E. coli* (EC WT), CFP-labeled  
192 *E. coli* methionine auxotroph (EC Met-), and YFP-labeled *S. typhimurium* (ST Lac-). This  
193 consortium was characterized in four conditions that varied the carbon source (lactose or glucose)  
194 and the presence or absence of supplemented methionine. In lactose minimal media, *E. coli* can  
195 consume lactose and secrete carbon byproducts that can be utilized as substrates by ST Lac\*  
196 (**Table 1**, E3-6) (Harcombe, 2010). In the absence of supplemented methionine, the growth of EC  
197 Met- is dependent on methionine provided by constituent community members.

198 We used MINI-Drop to infer the pairwise microbial interaction network based on the  
199 patterns in the number of cells of each community member in single strain and two-member  
200 droplets. In lactose minimal media lacking supplemented methionine, the inferred network  
201 recapitulated the expected network, exhibiting bidirectional positive interactions between ST Lac\*  
202 and EC Met- and unidirectional positive interactions from EC WT to ST Lac\* to EC Met- (**Fig.**  
203 **3a,e,i**, **Table 1**, E3, **Table S1**). In lactose minimal media supplemented with methionine, the  
204 positive outgoing interactions from EC WT or ST Lac\* to EC Met- were absent in the network and  
205 bidirectional negative interactions linked EC Met- and EC WT (**Fig. 3b,f,j**, **Table 1**, E4). In glucose  
206 minimal media lacking supplemented methionine, the positive interactions from EC WT or EC  
207 Met- to ST Lac\* were absent and instead EC WT and ST Lac\* were coupled by bidirectional  
208 negative interactions (**Fig. 3c,g,k**, **Table 1**, E5). By contrast to the expected network, bidirectional  
209 negative interactions were inferred between all pairs of strains in glucose minimal media  
210 supplemented with methionine (**Fig. 3d,h,l**, **Table 1**, E6). Across all conditions, the sign of the  
211 Pearson correlation coefficient clustered according to the pairwise network topology, wherein  
212 positive or negative correlation coefficients were associated with positive or negative interactions,  
213 respectively (**Fig. S3**, **Fig. S4**). These data show that correlations in the absolute abundance of  
214 strains across droplets can be used to classify specific topologies of two-member microbial  
215 interaction networks. Media containing lactose as a primary carbon source promoted strain co-  
216 existence in three-member droplets, suggesting that positive interactions from EC Met- or EC WT  
217 to ST Lac\* are critical interactions that promote community stability across different environments  
218 (**Fig. S5a**). In sum, our results demonstrate that the microbial interaction network is highly context-  
219 dependent and the network topology changes as a function of the molecular composition of the  
220 environment.

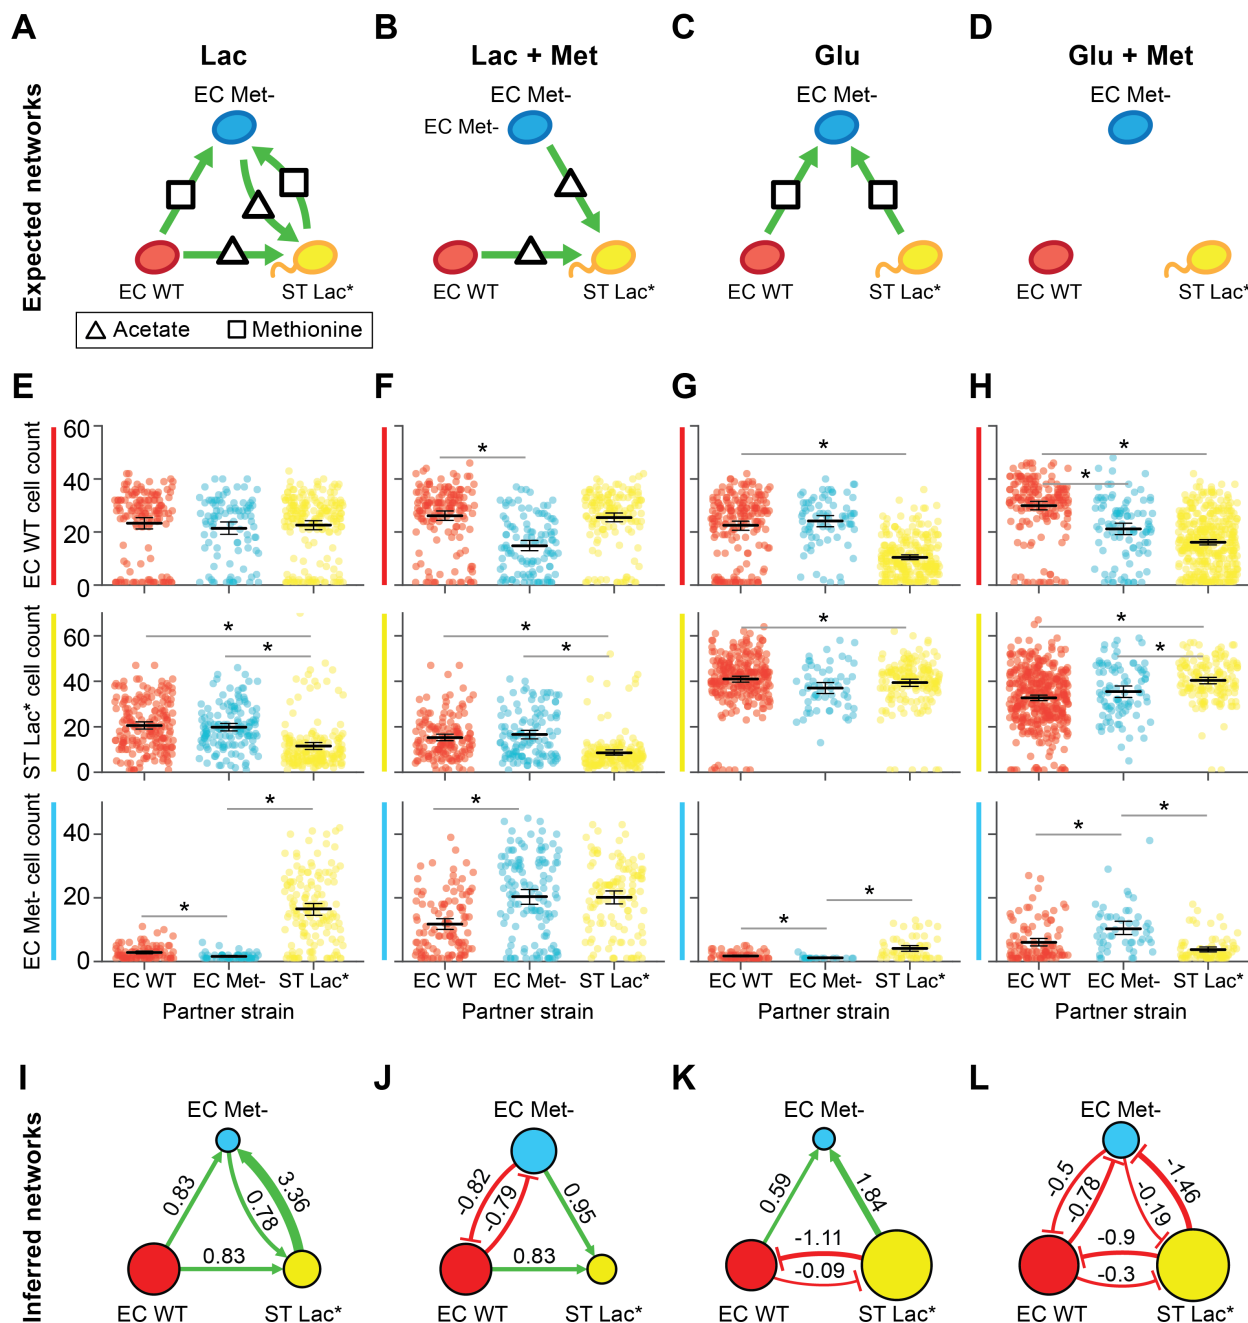

221

222 **Fig. 3. The molecular composition of the environment shapes the interaction network of a three-**  
 223 **member consortium.** (a) Schematic of the expected microbial interaction network of a three-member  
 224 consortium consisting of RFP-labeled *E. coli* (EC WT), CFP-labeled *E. coli* methionine auxotroph (EC Met-  
 225 ), and YFP-labeled *S. Typhimurium* deficient in lactose metabolism (ST Lac\*) in lactose minimal media  
 226 lacking supplemented methionine (Table 1, E3). Secreted carbon byproducts (acetate) and methionine are  
 227 represented by a triangle and rectangle, respectively. Node colors and green arrows denote the type of  
 228 fluorescent reporter and positive interactions, respectively. (b) Schematic of the expected microbial  
 229 interaction network in lactose minimal media supplemented with methionine (Table 1, E4). (c) Schematic  
 230 of the expected microbial interaction network in glucose minimal media lacking supplemented methionine  
 231 (Table 1, E5). (d) Schematic of the expected microbial interaction network in glucose minimal media  
 232 supplemented with methionine (Table 1, E6). (e) Cell count distributions in lactose minimal media for EC



233 WT (top), ST Lac\* (middle) or EC Met- (bottom). The black line represents the mean and the error bars  
234 denote the bootstrapped 95% confidence intervals for the mean. The gray horizontal bars indicate a  
235 statistically significant difference ( $p < 0.05$ , **Table S1**) based on the Mann-Whitney U test. **(f)** Cell count  
236 distributions in lactose minimal media supplemented with methionine for EC WT (top), ST Lac\* (middle) or  
237 EC Met- (bottom). **(g)** Cell count distributions in glucose minimal media for EC WT (top), ST Lac\* (middle)  
238 or EC Met- (bottom). **(h)** Cell count distributions of EC WT (top), ST Lac\* (middle) or EC Met- (bottom) in  
239 glucose minimal media supplemented with methionine. **(i)** Inferred interaction network in lactose minimal  
240 media lacking supplemented methionine. The edge width is proportional to the  $\log_2$  ratio of the average cell  
241 count in the presence of a partner to the average cell count in the absence of the partner. Node size is  
242 proportional to the average cell count of each strain grown in isolation. **(j)** Inferred network in lactose minimal  
243 media supplemented with methionine. **(k)** Inferred interaction network in glucose minimal media lacking  
244 supplemented methionine. **(l)** Inferred interaction network in glucose minimal media supplemented with  
245 methionine.

246

### 247 *Investigating higher-order interactions using MINI-Drop*

248 Higher-order interactions occur when a pairwise interaction is modified in the presence of a third  
249 community member (Bailey et al., 2016; Society, 2015) and these interactions are challenging to  
250 identify in microbial communities. In MINI-Drop, a higher-order interaction was defined as a  
251 difference in the presence and sign (positive or negative) of an interaction in a three-member  
252 community compared to the presence and sign of the interaction in each two-member sub-  
253 community (**Fig. 4a**). We tested whether MINI-Drop could identify higher-order interactions by  
254 analyzing the cell count distributions of each strain in three-member droplets in addition to single-  
255 strain and two-member droplets. To do so, a community consisting of an RFP-labeled *E. coli*  
256 methionine auxotroph that is also deficient in lactose metabolism (EC Met- Lac\*, **Table 1**, E7),  
257 EC Met- (CFP) and ST Lac\* was constructed. In lactose minimal media lacking supplemented  
258 methionine, EC Met- and ST Lac\* can secrete carbon byproducts and methionine, respectively  
259 and thus together enable the growth of EC Met- Lac\*. Our results showed that the number of EC  
260 Met- Lac\* cells was higher in the presence of both EC Met- and ST Lac\* but not in the presence  
261 of either single strain, demonstrating that MINI-Drop could identify higher-order interactions (**Fig.**  
262 **4b**,  $p=0.0012$ ). The strains EC Met- (CFP) and ST Lac\* interacted via bidirectional positive  
263 interactions, recapitulating the expected network topology (**Fig. 3a**, **Fig. S5b,c**). In addition, the  
264 cell counts of EC Met- and ST Lac\* displayed a strong positive correlation (**Fig. S3d**).

265 To investigate other higher-order interactions that were present in our data, we analyzed  
266 droplets containing three-member consortium (EC WT, EC Met- and ST Lac), two-member sub-  
267 communities and single strains across four different environments (**Fig. 3**, **Table 1**, E3-E7). Our  
268 results illuminated a higher-order interaction in lactose minimal media (**Table 1**, E3), where EC  
269 WT was significantly inhibited in the presence of both EC Met- and ST Lac\*, while no negative  
270 interaction was observed in the pairwise interaction networks of EC WT co-cultured with EC Met-  
271 or ST Lac\* (**Fig. 3a**, **4d,e**). Unexpected higher-order interactions occurred in one of twelve  
272 possible cases (3 community members times 4 environments) in the EC Met-, EC WT, ST Lac\*  
273 consortium (**Table 1**, E3-6). In sum, our results show that MINI-Drop can rapidly elucidate higher-  
274 order interactions based on the absolute abundance patterns in droplets containing 1-3 strains.  
275 demonstrating that higher-order interactions were infrequent in this community across different  
276 environmental conditions.

277 To evaluate the sensitivity of the method, we next investigated the number of droplets  
278 containing the same initial strain composition (replicates) required to infer microbial interactions  
279 of different strengths across all datasets. Specifically, we analyzed the relationship between

280 interaction strength magnitude, number of replicates, and interaction significance ( $p < 0.05$ ) in all  
 281 datasets (**Fig. S6**). Our results showed that the significance of each interaction increased  
 282 exponentially as a function of the number of droplets (**Fig. S6a**). The strength of the interaction  
 283 was inversely related to the number of droplets required for statistical significance of the  
 284 interaction. For example, strong interactions required as few as 15 replicates whereas weak  
 285 interactions required more than 50 replicates (**Fig. S6b**).  
 286  
 287

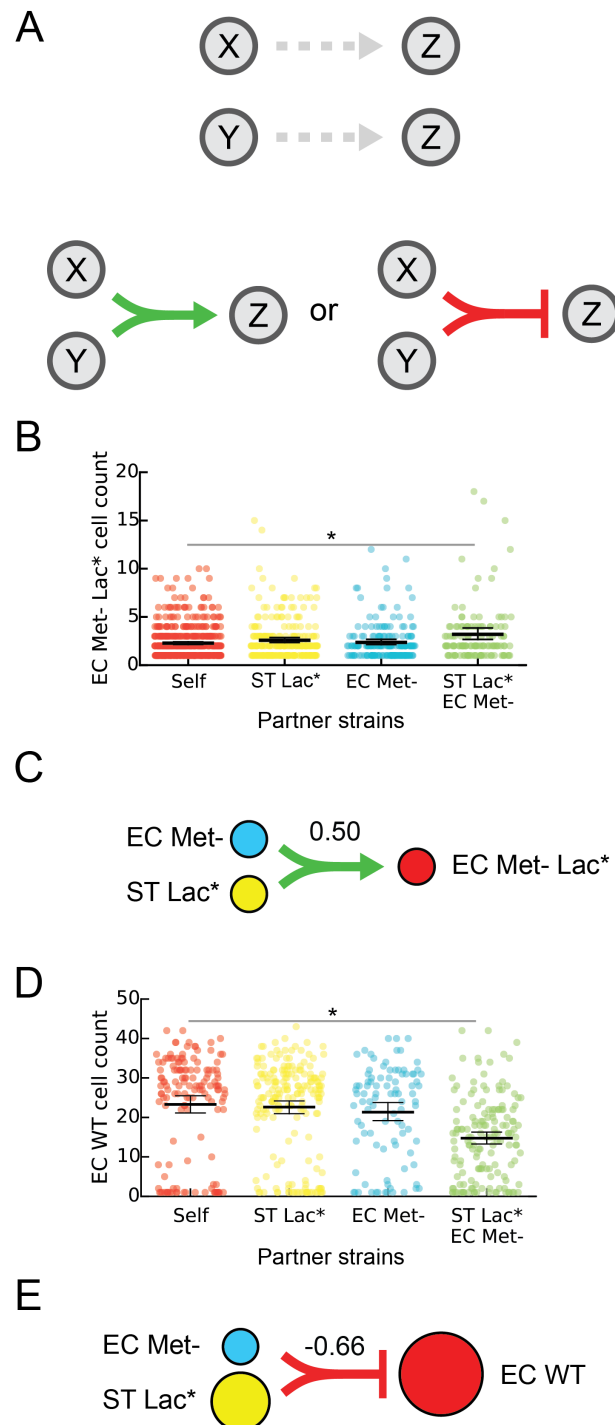

288

289 **Fig. 4. Investigating higher-order interactions using MINI-Drop.** (a) Schematic showing an example of  
290 a higher-order interaction. Droplets containing two strains X and Z or Y and Z do not exhibit interactions. In  
291 three-member droplets, a negative or positive interaction from X and Y to Z is present and is defined as a  
292 higher-order interaction. (b) Categorical scatter plots of the number of EC Met- Lac\* cells in droplets  
293 containing the single strain EC Met- Lac\* (self), pairs of strains including EC Met- Lac\* and EC Met- or ST  
294 Lac\* or all three strains (EC Met- Lac\*, EC Met- and ST Lac\*). Black horizontal bars denote the mean  
295 number of cells per droplet and error bars represent the bootstrapped 95% confidence interval for the mean.  
296 The horizontal bar (gray) represents a statistically significant difference in means based on the Mann-  
297 Whitney U test ( $p = 1.2e-3$ ,  $n = 703$ ). (c) Schematic showing the higher-order inferred network for the data  
298 shown in panel (b). The line width represents the inferred strength of the higher-order interaction. Node size  
299 is proportional to the average cell count of each strain grown in isolation. (d) Categorical scatter plots of the  
300 number of EC WT cells in droplets containing the single strain EC WT, two strains including EC WT and ST  
301 Lac\* or EC Met- or all three strains (EC WT, ST Lac\* and EC Met-) in lactose minimal media. The horizontal  
302 bar (gray) represents a statistically significant difference in means based on the Mann-Whitney U test ( $p =$   
303  $2.9e-10$ ,  $n = 296$ ). (e) Schematic showing a higher-order interaction inferred using the data shown in (d).  
304 The line width represents the strength of the inferred higher-order interaction. Node size is proportional to  
305 the average cell count of each strain grown in isolation.

306

#### 307 *Discrete-time Markov model of community assembly*

308 In small microbial populations, stochastic variation in intracellular molecular concentrations,  
309 growth and death can impact community assembly and functions (Boedicker et al., 2009; Connell  
310 et al., 2014; Hansen et al., 2016). To model community assembly in small populations, microbial  
311 growth can be represented as a probabilistic event, such that two communities seeded with the  
312 same initial strain composition exhibit different steady-state community compositions (**Fig. 5a**)  
313 (Horowitz et al., 2010). We constructed a discrete-time Markov model of cell growth modified by  
314 microbial interactions to investigate the variability in community composition across droplets  
315 containing the same initial strain composition.

316 In the model, communities are initially seeded with a single cell of each type. At each time  
317 step, strain  $i$  can undergo cell division, death or remain static according to the probabilities  $P_{div,i}$ ,  
318  $P_{death,i}$ , and  $P_{static,i}$ , respectively (**Fig. 5b**). The probabilities  $P_{div,i}$  and  $P_{static,i}$  are a function of  
319 the number of cells of each strain with parameters specific to each strain and the probability  
320  $P_{death,i}$  is a fixed parameter. Negative interactions with self or non-self are represented by inverted  
321 sigmoidal logistic functions, such that the probability of cell division is inversely related to the cell  
322 number. Positive interactions are represented as sigmoidal logistic functions, such that the  
323 probability of cell division increases as a function of the number of partner cells (see Materials  
324 and Methods).

325 We tested whether this modeling framework could recapitulate the experimental cell count  
326 distributions, based on the assumption that the measurement time point maps to the steady-state  
327 of the model. Models were constructed using the positive or negative interaction functions and  
328 model parameters were identified to recapitulate the cell count distributions of each strain. We  
329 constructed a model for the EC WT, ST Lac\* community grown in glucose minimal media that  
330 exhibited a bidirectional negative interaction network (**Fig. 5c**, left). Our results showed three  
331 clusters representing distinct community states exhibiting high abundance of one strain (**Fig. 5c**,  
332 center, clusters 1 and 2), co-existence of both strains (**Fig. 5c**, center, cluster 4), or low cell counts  
333 of both strains (**Fig. 5c**, center, cluster 3). Representative images of droplets from each cluster  
334 showed significant differences in community composition (**Fig. 5c**, right). A model of a  
335 bidirectional negative interaction network displaying strong and weak negative interactions was  
336 able to recapitulate the cell count distribution (**Fig. 5c**, middle, **Table S3**).

337 We next evaluated whether the model could recapitulate the cell count distributions of  
338 networks that displayed positive interactions. Models constructed for the EC Met-, ST Lac\*  
339 consortium in two different environments exhibiting unidirectional or bidirectional positive  
340 interactions (**Table 1**, E3-4) could recapitulate the cell count distributions (**Fig. 5d,e**). Next, a  
341 model was developed for the mazF inhibition consortium (**Table 1**, E2) that displayed a  
342 bidirectional negative interaction network. A model of strong and weak bidirectional negative  
343 interactions represented the negative correlation in cell counts of the sender and receiver strains  
344 (**Fig. 5f**). Our results demonstrate that bidirectional negative interaction networks can realize  
345 distinct community state distributions (**Fig. 5c,f**). In the model, the number of partner cells required  
346 to impact the probability of cell division dictates the strength of an interaction (**Fig. 5f, Fig. S7**).  
347 The toxin mediated negative interaction in the mazF inhibition consortium (**Table 1**, E2) exhibited  
348 a higher sensitivity to partner cell number than the negative interaction from ST Lac\* to EC WT in  
349 glucose minimal media (**Table 1**, E5, **Fig. S7**). Therefore, the recipients of the strong negative  
350 interactions displayed different sensitivities to variations in donor cell number, providing insight  
351 into the qualitative dissimilarities in the cell count distributions. In sum, the model was able to  
352 describe the cell count distributions for positive and negative interactions mediated by distinct  
353 molecular mechanisms, illustrating that a probabilistic growth model can explain the variability in  
354 community states in small populations.  
355  
356  
357

358

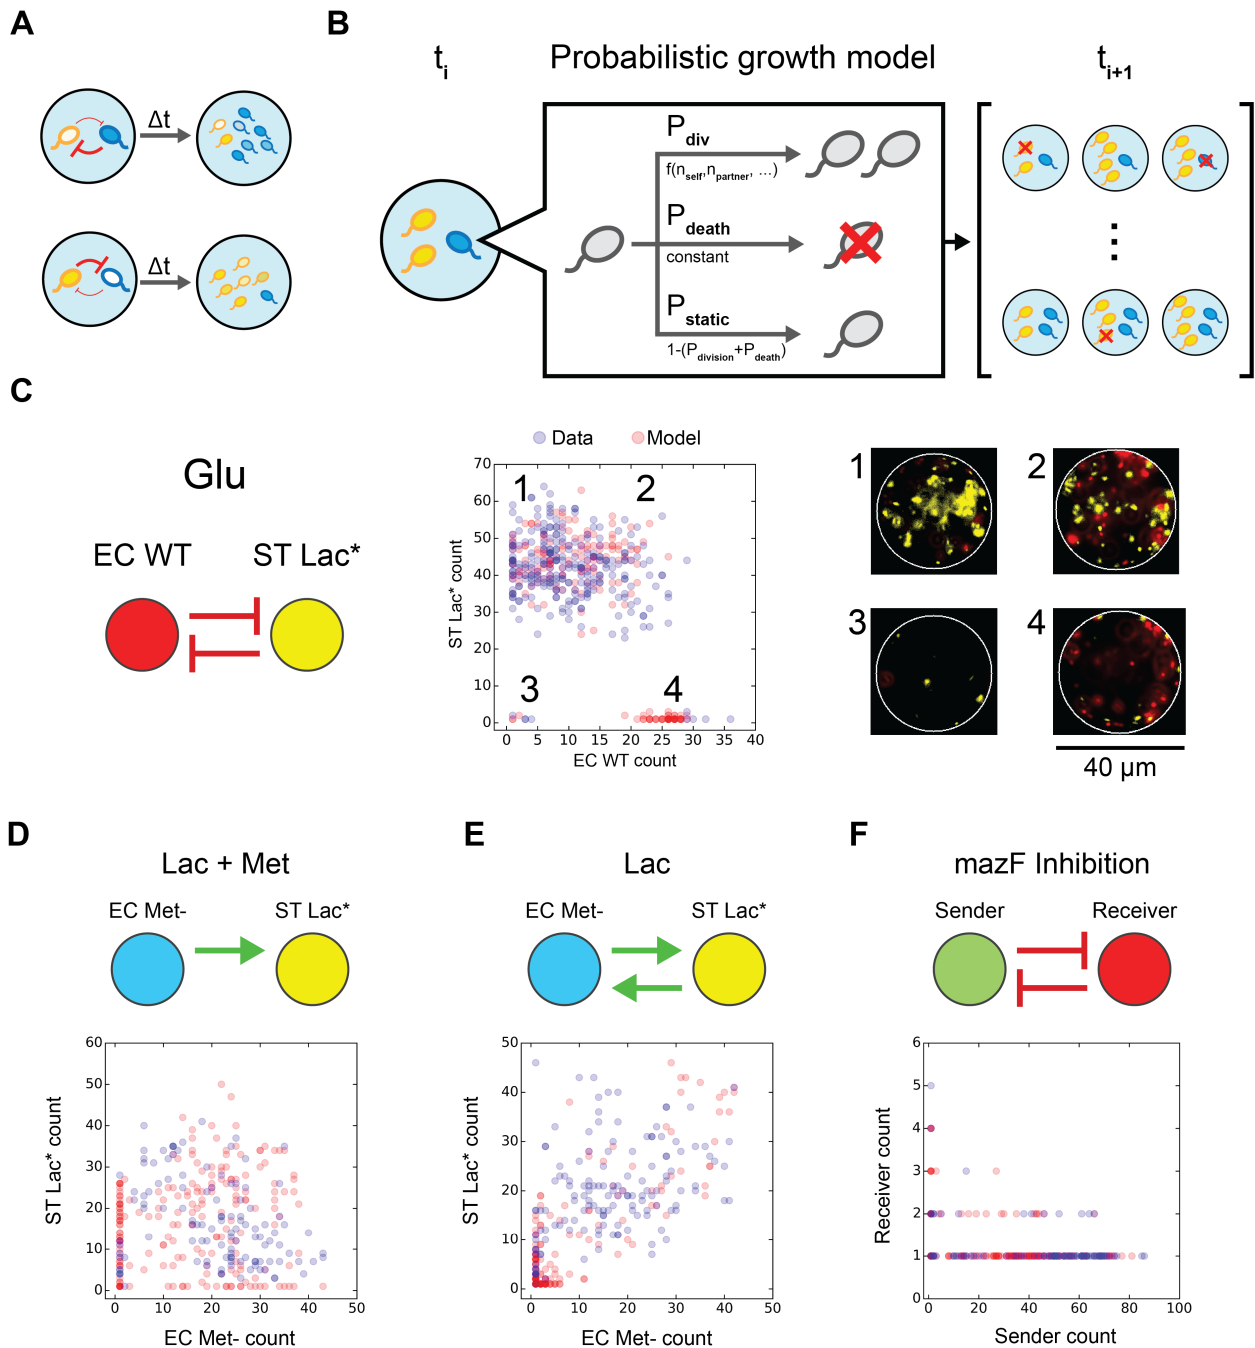

359

360 **Fig. 5. Discrete-time Markov model of cell growth modified by microbial interactions can recapitulate**  
 361 **cell count distributions in microfluidic droplets.** (a) Schematic of variability in community assembly in  
 362 small populations. Stochasticity in intracellular molecular concentrations can alter the strength of microbial  
 363 interactions, generating different community states (high blue cells, low yellow cells or the reciprocal). (b)  
 364 Schematic of the discrete-time Markov model of cell growth modified by microbial interactions. At each time  
 365 step, each cell can undergo cell division, cell death or remain static according to the probabilities  $P_{div}$ ,  $P_{death}$   
 366 or  $P_{static}$ , respectively. (c) Inferred network topology using MINI-Drop (left) for the EC WT, ST Lac\*  
 367 consortium in glucose minimal media (Table 1, E5). Node size and edge weight represent the average cell  
 368 count of each strain grown in isolation and the interaction strength, respectively. Scatter plot of

369 experimentally measured cell counts (blue circles, n=257) of EC WT and ST Lac\* or model steady-states  
370 (red circles, n=200). This bidirectional negative interaction network generated qualitatively different  
371 community compositions corresponding to (1) low and high EC WT and ST Lac\*, respectively, (2) high EC  
372 WT and ST Lac\*, (3) low EC WT and ST Lac\*, (4) high EC WT and low ST Lac\*. Fluorescence microscopy  
373 images (right) of a representative droplet in each community state 1-4 are shown (right). **(d)** Inferred network  
374 for the EC Met-, ST Lac\* consortium (top) in lactose minimal media supplemented with methionine (**Table**  
375 **1**, E4). Scatter plot of experimentally measured cell counts (blue circles, n=118) of EC Met- and ST Lac\* or  
376 model steady-states (red circles, n=200). **(e)** Inferred interaction network for the EC Met-, ST Lac\*  
377 consortium in lactose minimal media (top, **Table 1**, E3). Scatter plot of experimentally measured cell counts  
378 (blue circles, n=141) of EC Met- and ST Lac\* or model steady-states (red circles, n=200). **(f)** Inferred  
379 interaction network for the sender, receiver consortium (top, **Table 1**, E2). Scatter plot of experimentally  
380 measured cell counts (blue circles, n=93) of the sender and receiver strains or model steady-states (red  
381 circles, n=200).

382

## 383 **Discussion**

384 We showed that MINI-Drop can rapidly infer pairwise as well as higher-order microbial interactions  
385 in 2- to 3-member consortia in different environmental conditions. This method can be scaled to  
386 quantify interactions in higher-dimensional (>3 members) communities using compatible  
387 fluorescent labels or combinatorial fluorescent imaging of multiple reporters within the same cell.  
388 Combinatorial labeling via fluorescence in situ hybridization (Liu et al., 2011; Valm et al., 2012) or  
389 fluorescent labeling of the bacterial outer membranes via biorthogonal click chemistry could be  
390 used to measure the absolute abundance of organisms that are not genetically tractable (Geva-  
391 Zatorsky et al., 2015).

392 In MINI-Drop, a single experiment generates hundreds to thousands of replicates of  
393 unique sub-communities. The initial mean number of cells per drop can be manipulated to  
394 investigate the contribution of initial cell density to microbial interactions or increase the proportion  
395 of multi-strain droplets for interrogation of higher-order interactions. MINI-Drop does not require  
396 coexistence of community members to determine interactions because fluorescently tagged  
397 single cells encapsulated in a droplet can be accurately quantified.

398 Previous methods of microbial interaction inference using modeling frameworks such as  
399 the generalized Lotka-Volterra (gLV) model are constrained by mathematical relationships  
400 (Momeni et al., 2017). For example, a gLV model of strong bidirectional positive interactions tends  
401 to be unstable, leading to potential underrepresentation of bidirectional positive interactions.  
402 Further, it is challenging to pinpoint if the failure of a pairwise gLV model to accurately fit  
403 experimental data is attributed to the presence of higher-order interactions or to unmodeled  
404 dynamics such as metabolites mediating the interactions. By contrast, MINI-Drop is not  
405 constrained to a defined mathematical framework and thus can rapidly identify higher-order  
406 interactions in the networks. We showed that MINI-Drop accurately inferred diverse interaction  
407 topologies including unidirectional positive, bidirectional positive or bidirectional negative  
408 networks. In addition to deciphering engineered interactions, MINI-Drop illuminated unexpected  
409 negative pairwise interactions and higher-order interactions in the networks. The unexpected  
410 higher-order interaction that inhibited EC WT in the presence of both EC Met- and ST Lac\* could  
411 be explained by robust growth of the mutualistic pair EC Met- and ST Lac\*, which in turn  
412 negatively impacted EC WT. Across all experiments, *S. typhimurium* exhibited the strongest  
413 outgoing negative interactions as well as the highest carrying capacity, suggesting that the  
414 negative interactions could arise from competition for limited resources or space or the production  
415 of toxic compounds.

416 The throughput of the MINI-Drop method was enabled by coupling two automated and  
417 scalable technologies, droplet microfluidics and computational image analysis. The large number  
418 of sub-community replicates provided by MINI-Drop allows investigation of the contribution of  
419 initial conditions to community assembly in small populations. A probabilistic analysis of the  
420 distribution of community states provides insight into the stochastic nature of microbial  
421 interactions and impact of these parameters on community assembly. For example, we observed  
422 that bidirectional positive networks displayed frequent co-occurrence (**Fig. 5e, Fig. S3, Fig. S4**)  
423 whereas a bidirectional negative network can realize a set of distinct community states (**Fig. 5c,e**).

424 Our stochastic growth model can recapitulate the community states observed  
425 experimentally a set of synthetic communities. This demonstrates that a simple probabilistic  
426 representation of cell growth, death and microbial interactions can give rise to multiple community  
427 steady-states from the same initial conditions. Our modeling framework could be used to predict  
428 the probability of strain growth as a function of the initial strain proportions and cell density. These  
429 parameters could be manipulated to maximize the likelihood of community member coexistence  
430 in multi-species consortia. In sum, we developed a systematic procedure to elucidate microbial  
431 interaction networks in microdroplets. Future work will apply MINI-Drop to study diverse cellular  
432 interactions such as interkingdom or mammalian cell interactions.

## 433 **MATERIALS AND METHODS**

434

### 435 *Dynamic range of cell counting*

436 The bacterial strains EC Met- (CFP), EC WT (RFP), and ST Lac\* (YFP) were grown in LB medium  
437 to early stationary phase, centrifuged at 18,000xg for 1 min, decanted, and resuspended in M9  
438 minimal medium without glucose. Next, the cells were centrifuged at 18,000xg for 1 min, decanted  
439 and resuspended in a smaller volume of M9 minimal medium without glucose to concentrate the  
440 cells. The OD600 values of the concentrated EC Met-, EC WT and ST Lac\* cultures were 14.4,  
441 19.6, and 6.4, respectively. Equal volumes of each culture were combined to generate the mixed  
442 culture. The mixed culture was serially diluted by a factor of 2 until a dilution of  $2^{-7}$  was reached.  
443 The diluted cultures were encapsulated separately using the droplet maker device and the  
444 resulting droplets were imaged and quantified using the computational image analysis pipeline.

### 445 *Bacterial cell culturing*

446 Strains were grown for approximately 12 hours at 37°C in LB, diluted 1:50 into fresh LB, and then  
447 grown to an OD600 of 0.3-1. Next, the culture (3 mL) was centrifuged for 2 min at 3,500 x g and  
448 supernatant was removed. The cells were washed 4X by resuspending the pellet in 0.5 mL of  
449 minimal media and centrifuged as described above. The cell cultures containing different strains  
450 were normalized to an OD600 of 0.15 and mixed in a 1:1 ratio. In the mutualism experiment (E2),  
451 *B. subtilis* and *E. coli* were mixed in a 2:1 volumetric ratio to account for differences in the cell  
452 number to OD ratios. In experiment E1, cells were cultured in M9 supplemented with glucose (1X  
453 M9 salts, 2 mM MgSO<sub>4</sub>, 100 μM CaCl<sub>2</sub>, 0.4% glucose) and 25 μg/mL chloramphenicol (Sigma).  
454 In experiment E2, cells were cultured in LB media containing 50 ng/mL anhydrotetracycline (aTc,  
455 Cayman Chemicals), 0.1% arabinose (Sigma) and 25 μg/mL chloramphenicol. In experiments E3-  
456 E7, cells were cultured in M9 media (1X M9 salts, 2 mM MgSO<sub>4</sub>, 100 μM CaCl<sub>2</sub>) supplemented  
457 with 0.4% glucose, 0.2% lactose and/or 200 μM methionine as indicated.

458

| Number | Strains                                        | Media            | Figure         |
|--------|------------------------------------------------|------------------|----------------|
| E1     | BS Trp-<br>EC Met- (RFP)                       | M9 Glucose       | 2a-d           |
| E2     | EC Sender<br>EC Receiver                       | LB               | 2e-h           |
| E3     | EC Met- (CFP)<br>ST Lac*<br>EC WT              | M9 Lactose       | 3a,e,i<br>4d,e |
| E4     | EC Met- (CFP)<br>ST Lac*<br>EC WT              | M9 Lactose + Met | 3b,f,j         |
| E5     | EC Met- (CFP)<br>ST Lac*<br>EC WT              | M9 Glucose       | 3c,g,k         |
| E6     | EC Met- (CFP)<br>ST Lac*<br>EC WT              | M9 Glucose + Met | 3d,h,l         |
| E7     | EC Met- (CFP)<br>ST Lac*<br>EC Met- Lac* (RFP) | M9 Lactose       | 4b,c           |

459 **Table 1.** Strains used in growth experiments.  
460

| Strain                | Genotype                                                                                                                  | Plasmid | Fluorescent reporter | Abbreviation                         | Reference                    |
|-----------------------|---------------------------------------------------------------------------------------------------------------------------|---------|----------------------|--------------------------------------|------------------------------|
| <i>B. subtilis</i>    | <i>B. subtilis</i> 168,<br><i>trpC2</i> , <i>cat</i> ,<br><i>amyE::Pveg-gfp-spec</i>                                      | None    | GFP                  | BS Trp-                              | (Burkholder and Giles, 1947) |
| <i>E. coli</i>        | <i>E. coli</i> BW25113<br><i>pheA::Kan</i>                                                                                | pOSV005 | RFP                  | EC Met- Lac*<br>and EC Met-<br>(RFP) | (Baba et al., 2006)          |
| <i>E. coli</i>        | <i>E. coli</i> BW27783                                                                                                    | pOSV022 | GFP                  | Sender                               | (Khlebnikov et al., 2001)    |
| <i>E. coli</i>        | <i>E. coli</i><br>MG1655z1                                                                                                | pOSV151 | RFP                  | Receiver                             | (Cox et al., 2007)           |
| <i>E. coli</i>        | <i>E. coli</i> K12<br>BW25113,<br>$\Delta metB$ <i>att::pLC2</i><br>80 [ <i>kan P<sub>L'</sub>-cfp</i><br><i>oriR6K</i> ] | None    | CFP                  | EC Met- (CFP)                        | (Adamowicz et al., 2018)     |
| <i>S. typhimurium</i> | LT2,<br><i>metA(P35L) met</i>                                                                                             | None    | YFP                  | ST Lac*                              | (Adamowicz et al., 2018;     |



|                |                                                             |         |     |       |                          |
|----------------|-------------------------------------------------------------|---------|-----|-------|--------------------------|
|                | <i>J</i> (16:IS10) att::p<br>LC246 [kan<br>P_L'-yfp oriR6K] |         |     |       | Douglas et al.,<br>2016) |
| <i>E. coli</i> | <i>E. coli</i> BW25113<br>metA::Kan                         | pOSV006 | RFP | EC WT | (Baba et al.,<br>2006)   |

461 **Table 2.** Strains and media conditions for each experiment.

462

463 *Fabrication of microfluidic devices*

464 Photoresist masters of 25  $\mu\text{m}$  layer height were fabricated by spinning a layer of photoresist SU-  
465 8 3025 (Microchem) onto a silicon wafer (University Wafer), then baked at 95°C for 10 minutes.  
466 Following baking, photoresist master was patterned by UV photolithography over a photomask  
467 (**File S1**, CADArt). The master was subjected to post-exposure bake at 95°C for 4 min and  
468 developed in fresh SU-8 developer (Microchem) for 6 min, prior to rinsing with isopropyl alcohol  
469 (Fischer Scientific) and baking at 150°C to remove the solvent. The microfluidic devices were  
470 fabricated by pouring poly(dimethylsiloxane) at a 11:1 polymer-to-crosslinker ratio (Dow Corning  
471 Sylgard 184) onto the master and curing at 65°C for 1 hr. The PDMS devices were excised with  
472 a scalpel and cored with a 0.75 mm biopsy core (World Precision Instruments) to create inlets  
473 and outlets. The device was then bonded to a microscope glass slide using O2 plasma cleaner  
474 (Harrick Plasma), and channels were treated with Aquapel (PPG Industries) to render them  
475 hydrophobic. Finally, the devices were baked at 65°C for 20 min to evaporate excess Aquapel  
476 prior to use.

477 *Encapsulation of cells into droplets and fluorescence microscopy*

478 To encapsulate cells into droplets, 1 mL syringes (BD Luer Lok) were fitted with 27 gauge needles  
479 and PE/2 tubing. 500  $\mu\text{L}$  of the culture was loaded into a 1 mL syringe. Hydrofluoroether oil was  
480 prepared with 2% Krytox as surfactant and loaded into a 1 mL syringe. The free end of the tubing  
481 was primed and inserted into the droplet-making device. Droplets were generated using 600  $\mu\text{L}$   
482  $\text{hr}^{-1}$  oil and 300  $\mu\text{L}$   $\text{hr}^{-1}$  cell mixture flow rates at a 30  $\mu\text{m}$  x 25  $\mu\text{m}$  junction, which generated ~40  
483  $\mu\text{m}$  diameter droplets at 4.8 kHz. Droplets were collected into a 1.5 mL microfuge tube for 15 min  
484 and incubated for 18 hr at 37°C. Droplets were imaged using chamber microscopy slides  
485 (Invitrogen C10228) and imaged with a 20X objective (Nikon, MRH10201) on a Ti-E Eclipse  
486 inverted microscope (Nikon). Fluorescence was imaged using the following filters (Chroma): (1)  
487 CFP: 436nm/20nm (ex), 480nm/40nm (em); (2) GFP: 470nm/40nm (ex), 525/50nm (em); (3) RFP:  
488 560nm/40nm (ex), 630/70nm (em); and (4) YFP: 500nm/40nm (ex), 535nm/30nm (em).

489 *Fluorescence microscopy image analysis*

490 Custom code in Python was used for automated cell counting in droplets and microbial interaction  
491 network inference. Droplets were identified from the phase contrast image using the Hough  
492 transformation algorithm (OpenCV 3). Droplets with a diameter 10% larger or smaller than 40  $\mu\text{m}$   
493 were removed from the dataset. Fluorescent cells were segmented by identifying connected  
494 regions using the SimpleBlobDetector object (OpenCV 3). Droplets were binned by the presence  
495 or absence of each fluorescently labeled strain. Interaction strength from strain  $j$  to strain  $i$ , where  
496 droplet  $d$  contains  $d_k$  cells of strain  $k$ , was defined according to Equation 1. Network schematics  
497 were drawn with Cytoscape 3.5 (Shannon et al., 2003).

498 
$$\log_2 \left( \frac{\text{mean}(d_i \forall d | d_i > 0, d_j > 0)}{\text{mean}(d_i \forall d | d_i > 0, d_j = 0)} \right) \quad (1)$$

499

500

501 *Discrete-time Markov model of cell growth*

502 A discrete-time Markov model was developed to recapitulate the experimentally measured cell  
 503 count distributions. At each time step, the propagation of each strain is determined by computing  
 504 the probability of cell division ( $P_{div,i}$ ), cell death ( $P_{death,i}$ ), and remaining unchanged ( $P_{static,i}$ )  
 505 (Equations 2-4).

506 
$$P_{div,i} = r_{div,io} \times I_{ii}(n_i, s_{ii}, k_{ii}, a_{ii}) \times I_{ij}(n_j, s_{ij}, k_{ij}, a_{ij}) \quad (2)$$

507 
$$P_{death,i} = r_{death,io} \quad (3)$$

508 
$$P_{static,i} = 1 - (P_{div,i} + P_{death,i}) \quad (4)$$

509

510 The parameter  $r_{div,io}$  is the basal probability of cell division for strain  $i$ . The parameter  $r_{death,io}$   
 511 represents the probability of cell death of strain  $i$  (constant).  $n_i$  denotes the number of cells of  
 512 strain  $i$  and  $s_{ij}$  defines whether the outgoing interaction of strain  $j$  (donor) to strain  $i$  is positive  
 513 ( $s_{ij} = 1$ ) or negative ( $s_{ij} = -1$ ). The parameters  $k_{ij}$  and  $a_{ij}$  define the sigmoidal interaction  
 514 function  $I_{ij}$ , representing the incoming interaction for strain  $i$  produced by strain  $j$  (Equation 5).

515 
$$I_{ij} = \begin{cases} \frac{(1+a_{ij})e^{k_{ij}n_j}}{1+a_{ij}e^{k_{ij}n_j}}, & \text{if } s_{ij} = +1 \\ \frac{(1+a_{ij})}{1+a_{ij}e^{k_{ij}n_j}}, & \text{if } s_{ij} = -1 \end{cases} \quad (5)$$

516 The negative interaction function approaches zero as a function of  $n_j$  whereas the positive  
 517 interaction approaches  $(1 + a_{ij})/a_{ij}$  as a function of  $n_j$ . The values of  $a_{ij}$  and  $r_{div,i}$  are constrained  
 518 such that  $P_{div,i} \leq 1$  (Equation 6). The self-interaction function  $I_{ii}(n_i, s_{ii}, k_{ii}, a_{ii})$  is less than one  
 519 ( $s_{ii} = -1$ ) and approaches zero as a function of  $n_i$ , leading to saturation of the number of cells of  
 520 strain  $i$ . The interaction function  $I_{ij}$ , is equal to 1 when  $n_j = 0$ , representing the absence of an  
 521 interaction between strain  $i$  and  $j$ . In the absence of an interaction between strain  $i$  and  $j$ ,  $P_{div,i}$  is  
 522 not dependent on strain  $j$  ( $s_{ij} = -1, k_{ij} = 0, a_{ij} = 0$ ). The outgoing interaction from the partner  
 523 strain  $j$   $I_{ij}(n_j, s_{ij}, k_{ij}, a_{ij})$  can be positive or negative depending on the value of the parameter  $s_{ij}$ .  
 524 The parameters  $a_{ij}$  and  $k_{ij}$  determine the interaction sensitivity defined as the number of partner  
 525 cells at the half-maximum of the interaction function  $\hat{n}_j$ . The parameters

526 
$$\hat{n}_j = \frac{1}{k_{ij}} \ln \left( \frac{1}{a_{ij}} + 2 \right) \quad (6)$$

527 
$$\left. \frac{dI_{ij}}{dn_j} \right|_{\hat{n}_j} = \begin{cases} \frac{k_{ij}(\frac{1}{a_{ij}}+2)}{4(a_{ij}+1)}, & \text{if } s_{ij} = 1 \\ -\frac{k_{ij}(\frac{1}{a_{ij}}+2)a_{ij}}{4(a_{ij}+1)}, & \text{if } s_{ij} = -1 \end{cases} \quad (7)$$

528 At each time step, the state transition of a cell is independent of all other cells and the cell's prior  
 529 history. The state transitions were simulated by sampling from a trinomial distribution determined  
 530 by the probabilities  $P_{div,i}$ ,  $P_{death,i}$ , and  $P_{static,i}$ . Communities were simulated for 100 time-steps  
 531 wherein each time-step corresponded to 10.8 minutes of experimental time. Variables were  
 532 constrained such that the cell populations reached a steady state within the simulation time. The  
 533 initial condition for all simulations was  $n_i, n_j = 1$ . Model parameters are listed in **Table S3**.

534

535 **ACKNOWLEDGEMENTS**

536 We would like to thank William Harcombe (University of Minnesota) for generously providing the  
537 *E. coli* Met- (CFP) and *S. typhimurium* (YFP) strains. We are grateful to Sonali Gupta and Yu-Yu  
538 Cheng for help with strain construction and Leland Hyman for assistance with droplet-  
539 microfluidics. This work was supported by the Army Research Office Young Investigator Award  
540 W911NF-17-1-0296.

541

542 **AUTHOR CONTRIBUTIONS**

543 O.S.V., R.H.H. and P.A.R. designed the research. R.H.H., J.W.T., R.L.C. carried out the  
544 experiments. R.H.H. designed and implemented data analysis methods and computational  
545 modeling. R.H.H., R.L.C. and O.S.V. wrote the manuscript and J.W.T. assisted in revising the  
546 manuscript.

547

548 **CONFLICT OF INTEREST**

549 The authors do not have a conflict of interest.

550

551 **REFERENCES**

552 Adamowicz, E.M., Flynn, J., Hunter, R.C., and Harcombe, W.R. (2018). Cross-feeding  
553 modulates antibiotic tolerance in bacterial communities. *ISME J.* 1–13.

554 Baba, T., Ara, T., Hasegawa, M., Takai, Y., Okumura, Y., Baba, M., Datsenko, K.A., Tomita, M.,  
555 Wanner, B.L., and Mori, H. (2006). Construction of *Escherichia coli* K-12 in-frame, single-gene  
556 knockout mutants: The Keio collection. *Mol. Syst. Biol.* 2.

557 Bachmann, H., Fischlechner, M., Rabbers, I., Barfa, N., Branco dos Santos, F., Molenaar, D.,  
558 and Teusink, B. (2013). Availability of public goods shapes the evolution of competing metabolic  
559 strategies. *Proc. Natl. Acad. Sci.* 110, 14302–14307.

560 Bairey, E., Kelsic, E.D., and Kishony, R. (2016). High-order species interactions shape  
561 ecosystem diversity. *Nat. Publ. Gr.* 7, 1–7.

562 Berendsen, R.L., Pieterse, C.M.J., and Bakker, P.A.H.M. (2012). The rhizosphere microbiome  
563 and plant health. *Trends Plant Sci.*

564 Boedicker, J.Q., Vincent, M.E., and Ismagilov, R.F. (2009). Microfluidic Confinement of Single  
565 Cells of Bacteria in Small Volumes Initiates High-Density Behavior of Quorum Sensing and  
566 Growth and Reveals Its Variability \*\*. *Angew. Chemie* 48, 5908–5911.

567 von Bronk, B., Schaffer, S.A., Götz, A., and Opitz, M. (2017). Effects of stochasticity and  
568 division of labor in toxin production on two-strain bacterial competition in *Escherichia coli*. *PLoS*  
569 *Biol.*

570 Burkholder, P., and Giles, N. (1947). Induced Biochemical Mutations in *Bacillus subtilis*. *Am. J.*  
571 *Bot.* 34, 345–348.

572 Cao, H.T., Gibson, T.E., Bashan, A., and Liu, Y.Y. (2017). Inferring human microbial dynamics  
573 from temporal metagenomics data: Pitfalls and lessons. *BioEssays* 39, 1–12.

574 Cao, X., Hamilton, J.J., and Venturelli, O.S. (2018). Understanding and Engineering Distributed  
575 Biochemical Pathways in Microbial Communities *Biochemistry XXXX*, XXX, XXX–XXX. 17, 28.

576 Clemente, J.C., Ursell, L.K., Parfrey, L.W., and Knight, R. (2012). The impact of the gut  
577 microbiota on human health: An integrative view. *Cell.*

578 Connell, J.L., Kim, J., Shear, J.B., Bard, A.J., and Whiteley, M. (2014). Real-time monitoring of

- 579 quorum sensing in 3D-printed bacterial aggregates using scanning electrochemical microscopy.  
580 Proc. Natl. Acad. Sci. *111*, 18255–18260.
- 581 Cox, R.S., Surette, M.G., and Elowitz, M.B. (2007). Programming gene expression with  
582 combinatorial promoters. Mol. Syst. Biol. *3*.
- 583 Douglas, S.M., Chubiz, L.M., Harcombe, W.R., Ytreberg, F.M., and Marx, C.J. (2016). Parallel  
584 mutations result in a wide range of cooperation and community consequences in a two-species  
585 bacterial consortium. PLoS One *11*, 1–19.
- 586 Fisher, C.K., and Mehta, P. (2014). Identifying keystone species in the human gut microbiome  
587 from metagenomic timeseries using sparse linear regression. PLoS One *9*, 1–10.
- 588 Friedman, J., Higgins, L.M., and Gore, J. (2017). Community structure follows simple assembly  
589 rules in microbial microcosms. Nat. Ecol. Evol. *1*.
- 590 Geva-Zatorsky, N., Alvarez, D., Hudak, J.E., Reading, N.C., Erturk-Hasdemir, D., Dasgupta, S.,  
591 Von Andrian, U.H., and Kasper, D.L. (2015). In vivo imaging and tracking of host-microbiota  
592 interactions via metabolic labeling of gut anaerobic bacteria. Nat. Med. *21*, 1091–1100.
- 593 Guo, X., and Boedicker, J.Q. (2016). The contribution of high-order metabolic interactions to the  
594 global activity of a four-species microbial community. PLoS Comput. Biol. *12*, 1–13.
- 595 Guo, M.T., Rotem, A., Heyman, J.A., and D. A. Weitz (2012). Droplet microfluidics for high-  
596 throughput biological assays. Lab Chip *12*, 2146–2155.
- 597 Hansen, R.H., Timm, A.C., Timm, C.M., Bible, A.N., Pelletier, D.A., Simpson, M.L., and Doktycz,  
598 M.J. (2016). Stochastic Assembly of Bacteria in Microwell Arrays Reveals the Importance of  
599 Confinement in Community Development. 1–18.
- 600 Harcombe, W.R. (2010). Novel cooperation experimentally evolved between species. Evolution  
601 (N. Y). *64*, 2166–2172.
- 602 Harcombe, W.R., Betts, A., Shapiro, J.W., and Marx, C.J. (2016). Adding biotic complexity alters  
603 the metabolic benefits of mutualism. Evolution *70*, 1871–1881.
- 604 Horowitz, J., Normand, M.D., Corradini, M.G., and Peleg, M. (2010). Probabilistic model of  
605 microbial cell growth, division, and mortality. Appl. Environ. Microbiol. *76*, 230–242.
- 606 Khlebnikov, A., Datsenko, K.A., Skaug, T., Wanner, B.L., and Keasling, J.D. (2001).  
607 Homogeneous expression of the PBADpromoter in Escherichia coli by constitutive expression of  
608 the low-affinity high-capacity araE transporter. Microbiology *147*, 3241–3247.
- 609 Kong, W., Meldgin, D.R., Collins, J.J., and Lu, T. (2018). Designing microbial consortia with  
610 defined social interactions. Nat. Chem. Biol. *14*, 821–829.
- 611 Liu, A., Archer, A.M., Biggs, M.B., and Papin, J.A. (2017). Growth-altering microbial interactions  
612 are responsive to chemical context. PLoS One *12*, e0164919.
- 613 Liu, P., Meagher, R.J., Light, Y.K., Yilmaz, S., Chakraborty, R., Arkin, A.P., Hazen, T.C., and  
614 Singh, A.K. (2011). Microfluidic fluorescence in situ hybridization and flow cytometry  
615 ( $\mu$ FlowFISH). Lab Chip *11*, 2673–2679.
- 616 Momeni, B., Xie, L., and Shou, W. (2017). Lotka-Volterra pairwise modeling fails to capture  
617 diverse pairwise microbial interactions. Elife *6*, 1–34.
- 618 Mounier, J., Monnet, C., Vallaeys, T., Arditi, R., Sarthou, A.-S., Hélias, A., and Irlinger, F.

- 619 (2008). Microbial interactions within a cheese microbial community. *Appl. Environ. Microbiol.* *74*,  
620 172–181.
- 621 Park, J., Kerner, A., Burns, M.A., and Lin, X.N. (2011). Microdroplet-Enabled Highly Parallel Co-  
622 Cultivation of Microbial Communities. *PLoS One* *6*.
- 623 Sender, R., Fuchs, S., and Milo, R. (2016). Revised Estimates for the Number of Human and  
624 Bacteria Cells in the Body. *PLoS Biol.*
- 625 Shannon, P., Markiel, A., Ozier, O., Baliga, N., Wang, J., Ramage, D., Amin, N., Schwikowski, B.,  
626 and Ideker, T. (2003). Cytoscape: A Software Environment for Integrated Models of  
627 Biomolecular Interaction Networks. *Genome Res.* *426*.
- 628 Society, E. (2015). Higher Order Interactions in Ecological Communities : What Are They and  
629 How Can They be Detected ? Author ( s ): Ian Billick and Ted J . Case Published by : Ecological  
630 Society of America HIGHER ORDER INTERACTIONS IN ECOLOGICAL COMMUNITIES :  
631 WHAT ARE THEY . *75*, 1529–1543.
- 632 Stoodley, P., Wilson, S., Hall-Stoodley, L., Boyle, J.D., Lappin-Scott, H.M., and Costerton, J.W.  
633 (2001). Growth and Detachment of Cell Clusters from Mature Mixed-Species Biofilms. *Appl.*  
634 *Environ. Microbiol.* *67*, 5608–5613.
- 635 Valm, A.M., Mark Welch, J.L., and Borisy, G.G. (2012). CLASI-FISH: Principles of combinatorial  
636 labeling and spectral imaging. *Syst. Appl. Microbiol.* *35*, 496–502.
- 637 Vega, N.M., and Gore, J. (2017). Stochastic assembly produces heterogeneous communities in  
638 the *Caenorhabditis elegans* intestine. *PLoS Biol.*
- 639 Venturelli, O.S., Egbert, R.G., and Arkin, A.P. (2016). Towards engineering biological systems  
640 in a broader context. *J. Mol. Biol.* *428*, 928–944.
- 641 Venturelli, O.S., Tei, M., Bauer, S., Chan, L.J.G., Petzold, C.J., and Arkin, A.P. (2017).  
642 Programming mRNA decay to modulate synthetic circuit resource allocation. *Nat. Commun.* *8*.
- 643 Venturelli, O.S., Carr, A., Fisher, G., Hsu, R., Lau, R., Bowen, B.P., Hromada, S., Northen, T.,  
644 and Arkin, A.P. (2018). Deciphering microbial interactions in synthetic human gut microbiome  
645 communities. *Mol. Syst. Biol.* *14*, e8157.
- 646 Zhou, J., Liu, W., Deng, Y., Jiang, Y.H., Xue, K., He, Z., Van Nostrand, J.D., Wu, L., Yang, Y.,  
647 and Wang, A. (2013). Stochastic assembly leads to alternative communities with distinct  
648 functions in a bioreactor microbial community. *MBio*.
